# Supplementary material for: Pleiotropy, cooperation, and the social evolution of genetic architecture
Source: PLOS journal article supplement (doi:10.1371/journal.pbio.2006671), 2018-10-25
Supplement: S2 (10.1371/journal.pbio.2006671.s002) [file journal.pbio.2006671.s002]

**S1 Table.** Previous claims about the general importance of pleiotropy in stabilising cooperation.

| <b>Reference</b>                   | <b>Importance of pleiotropy for stabilising cooperation</b>                                                                                                            |
|------------------------------------|------------------------------------------------------------------------------------------------------------------------------------------------------------------------|
| Foster et al., 2004<br>(p. 695)    | Pleiotropy is placed among other mechanisms such as (high relatedness) kin selection                                                                                   |
| Dandekar et al., 2012<br>(p. 266)  | Pleiotropy is placed alongside single cell/bottle-neck dispersal (kin selection) mechanisms                                                                            |
| Bruger & Waters, 2015<br>(p. 3)    | ‘metabolic constraint’ (private traits linked to cooperation) is one of the five mechanisms to maintain cooperation                                                    |
| Frénoy et al., 2015<br>(abstract)  | “Our results [...] uncover an important genetic mechanism for the evolution and maintenance of cooperation.”                                                           |
| Wang et al., 2015<br>(p. 2189)     | Pleiotropy (co-regulation) is placed alongside kin selection and policing.                                                                                             |
| Mitri & Foster, 2016<br>(p. 488)   | “Pleiotropy [...] is thought to be a key mechanism for stabilizing cooperation against cheater mutants”                                                                |
| Majerczyk et al., 2016<br>(p. 1-2) | Different forms of pleiotropy (metabolic constraint and coregulation) are given as two of the three ways that have been shown to stabilise cooperative quorum sensing. |
| Özkaya et al., 2017<br>(p. 3)      | Pleiotropy is given as one of the main ways to prevent cheating, alongside factors such as spatial structure (kin selection) and policing.                             |
| Asfahl & Shuster, 2017<br>(p. 99)  | Pleiotropy is an ‘evolutionary force’ in addition to kin selection                                                                                                     |
| Chisholm et al., 2018<br>(p. 47)   | “Genetic interaction [...] may play a key role in the maintenance of altruistic traits.”                                                                               |
